# Supplementary material
Source: ML conference proceedings conference paper supplement (https://proceedings.neurips.cc/paper_files/paper/2018/hash/198dd5fb9c43b2d29a548f8c77e85cf9-Abstract.html)
Supplement: Supplementary file [file 198dd5fb9c43b2d29a548f8c77e85cf9-Supplemental.zip]

## Appendix

### A Average Uplift in Terms of the Individual Uplift

$$\begin{aligned}
U(\pi) &= \iint \sum_{t=-1,1} yp(y | t, \mathbf{x})\pi(t | \mathbf{x})p(\mathbf{x})d\mathbf{x} - \iint \sum_{t=-1,1} yp(y | t, \mathbf{x})1[t = -1]p(\mathbf{x})d\mathbf{x} \\
&= \iint y[p(y | t = 1, \mathbf{x})\pi(t = 1 | \mathbf{x}) - p(y | t = -1, \mathbf{x})\pi(t = 1 | \mathbf{x})]p(\mathbf{x})d\mathbf{x} \\
&= \iint y[p(y | t = 1, \mathbf{x}) - p(y | t = -1, \mathbf{x})]\pi(t = 1 | \mathbf{x})p(\mathbf{x})d\mathbf{x} \\
&= \int u(\mathbf{x})\pi(t = 1 | \mathbf{x})p(\mathbf{x})d\mathbf{x}.
\end{aligned} \tag{15}$$

### B Area Under the Uplift Curve and Ranking

Define the following symbols:

- $C_\alpha := \Pr[f(\mathbf{x}) < \alpha]$ ,
- $U(\alpha; f) := \int u(\mathbf{x})1[\alpha \leq f(\mathbf{x})]p(\mathbf{x})d\mathbf{x}$ ,
- $\text{Rank}(f) := \mathbf{E}[1[f(\mathbf{x}') \leq f(\mathbf{x})][u(\mathbf{x}') - u(\mathbf{x})]]$ ,
- $\text{AUUC}(f) := \int_0^1 U(\alpha; f)dC_\alpha$ .

Then, we have

$$\begin{aligned}
\text{AUUC}(f) &= \int_{-\infty}^{\infty} U(\alpha) \frac{dC_\alpha}{d\alpha} d\alpha \\
&= \int_{-\infty}^{\infty} U(\alpha) p_{f(\mathbf{x})}(\alpha) d\alpha \\
&= \int_{\mathbb{R}^d} U(f(\mathbf{x})) p(\mathbf{x}) d\mathbf{x} \\
&= \iint 1[f(\mathbf{x}) \leq f(\mathbf{x}')] u(\mathbf{x}') p(\mathbf{x}') d\mathbf{x}' p(\mathbf{x}) d\mathbf{x} \\
&= \mathbf{E}[1[f(\mathbf{x}) \leq f(\mathbf{x}')] u(\mathbf{x}')] \\
&= (\mathbf{E}[1[f(\mathbf{x}) \leq f(\mathbf{x}')] [y^+ - y^-]]),
\end{aligned}$$

where  $y^+ \sim p(y | \mathbf{x}', t = 1)$  and  $y^- \sim p(y | \mathbf{x}', t = -1)$ .

Assuming  $\Pr[f(\mathbf{x}') = f(\mathbf{x})] = 0$ , we have

$$\begin{aligned}
\text{Rank}(f) &:= \mathbf{E}[1[f(\mathbf{x}) \geq f(\mathbf{x}')] [u(\mathbf{x}) - u(\mathbf{x}')] ] \\
&= \mathbf{E}[1[f(\mathbf{x}) \geq f(\mathbf{x}')] u(\mathbf{x})] \\
&\quad - \mathbf{E}[1[f(\mathbf{x}) \geq f(\mathbf{x}')] u(\mathbf{x}')] \\
&= \text{AUUC}(f) - \mathbf{E}[(1 - 1[f(\mathbf{x}) \leq f(\mathbf{x}')] ) u(\mathbf{x}')] \\
&= \mathbf{E}[u(\mathbf{x})] - 2 \text{AUUC}(f).
\end{aligned}$$

Thus,  $\text{Rank}(f) = 2(\text{AUUC}(f) - \text{AUUC}(r))$ , where  $r : \mathbb{R}^d \rightarrow \mathbb{R}$  is the random ranking scoring function that outputs 1 or  $-1$  with probability  $1/2$  for any input  $\mathbf{x}$ .  $\text{Rank}(f)$  is maximized when  $f(\mathbf{x}) \leq f(\mathbf{x}') \iff u(\mathbf{x}) \leq u(\mathbf{x}')$  for almost every pair of  $\mathbf{x} \in \mathbb{R}^d$  and  $\mathbf{x}' \in \mathbb{R}^d$ . In particular,  $f = u$  is a maximizer of the objective.

### C Proof of Lemma 1

**Lemma 1.** For every  $\mathbf{x}$  such that  $p_1(\mathbf{x}) \neq p_2(\mathbf{x})$ ,  $u(\mathbf{x})$  can be expressed as

$$u(\mathbf{x}) = 2 \times \frac{\mathbf{E}_{y \sim p_1(y|\mathbf{x})}[y] - \mathbf{E}_{y \sim p_2(y|\mathbf{x})}[y]}{\mathbf{E}_{t \sim p_1(t|\mathbf{x})}[t] - \mathbf{E}_{t \sim p_2(t|\mathbf{x})}[t]}. \tag{16}$$

*Proof.*

$$\begin{aligned}
\mathbf{E}_{y \sim p_1(y|\mathbf{x})}[y] - \mathbf{E}_{y \sim p_2(y|\mathbf{x})}[y] &= \int \sum_{\tau=-1,1} yp(y|\mathbf{x}, t=\tau)p_1(t=\tau|\mathbf{x})dy \\
&\quad - \int \sum_{\tau=-1,1} yp(y|\mathbf{x}, t=\tau)p_2(t=\tau|\mathbf{x})dy \\
&= \int \sum_{\tau=-1,1} yp(y|\mathbf{x}, t=\tau)(p_1(t=\tau|\mathbf{x}) - p_2(t=\tau|\mathbf{x}))dy \\
&= \sum_{\tau=-1,1} \mathbf{E}_{y \sim p(y|\mathbf{x}, t=\tau)}[y](p_1(t=\tau|\mathbf{x}) - p_2(t=\tau|\mathbf{x})) \\
&= \mathbf{E}_{y \sim p(y|\mathbf{x}, t=1)}[y](p_1(t=1|\mathbf{x}) - p_2(t=1|\mathbf{x})) \\
&\quad + \mathbf{E}_{y \sim p(y|\mathbf{x}, t=-1)}[y](1 - p_1(t=1|\mathbf{x}) - 1 + p_2(t=1|\mathbf{x})) \\
&= u(\mathbf{x})(p_1(t=1|\mathbf{x}) - p_2(t=1|\mathbf{x})).
\end{aligned}$$

When  $p_1(t=1|\mathbf{x}) \neq p_2(t=1|\mathbf{x})$ , it holds that

$$\begin{aligned}
u(\mathbf{x}) &= \frac{\mathbf{E}_{y \sim p_1(y|\mathbf{x})}[y] - \mathbf{E}_{y \sim p_2(y|\mathbf{x})}[y]}{p_1(t=1|\mathbf{x}) - p_2(t=1|\mathbf{x})} \\
&= 2 \times \frac{\mathbf{E}_{y \sim p_1(y|\mathbf{x})}[y] - \mathbf{E}_{y \sim p_2(y|\mathbf{x})}[y]}{\mathbf{E}_{t \sim p_1(t|\mathbf{x})}[t] - \mathbf{E}_{t \sim p_2(t|\mathbf{x})}[t]}.
\end{aligned}$$

□

## D Proof of Lemma 2

**Lemma 2.** For every  $\mathbf{x}$  such that  $p_1(\mathbf{x}) \neq p_2(\mathbf{x})$ ,  $u(\mathbf{x})$  can be expressed as

$$u(\mathbf{x}) = 2 \times \frac{\mathbf{E}[z|\mathbf{x}]}{\mathbf{E}[w|\mathbf{x}]},$$

where  $\mathbf{E}[z|\mathbf{x}]$  and  $\mathbf{E}[w|\mathbf{x}]$  are the conditional expectations of  $z$  given  $\mathbf{x}$  over  $p(z|\mathbf{x})$  and  $w$  given  $\mathbf{x}$  over  $p(w|\mathbf{x})$ , respectively.

*Proof.* We have

$$\begin{aligned}
\mathbf{E}[z|\mathbf{x}] &= \int \zeta \left[ \frac{1}{2}p_1(y=\zeta|\mathbf{x}) + \frac{1}{2}p_2(y=-\zeta|\mathbf{x}) \right] d\zeta \\
&= \frac{1}{2} \int \zeta p_1(y=\zeta|\mathbf{x}) d\zeta + \frac{1}{2} \int \zeta p_2(y=-\zeta|\mathbf{x}) d\zeta \\
&= \frac{1}{2} \int yp_1(y|\mathbf{x}) dy - \frac{1}{2} \int yp_2(y|\mathbf{x}) dy \\
&= \frac{1}{2} \mathbf{E}_{y \sim p_1(y|\mathbf{x})}[y] - \frac{1}{2} \mathbf{E}_{y \sim p_2(y|\mathbf{x})}[y].
\end{aligned}$$

Similarly, we obtain

$$\mathbf{E}[w|\mathbf{x}] = \frac{1}{2} \mathbf{E}_{t \sim p_1(t|\mathbf{x})}[t] - \frac{1}{2} \mathbf{E}_{t \sim p_2(t|\mathbf{x})}[t].$$

Thus,

$$2 \times \frac{\mathbf{E}[z|\mathbf{x}]}{\mathbf{E}[w|\mathbf{x}]} = 2 \times \frac{\mathbf{E}_{y \sim p_1(y|\mathbf{x})}[y] - \mathbf{E}_{y \sim p_2(y|\mathbf{x})}[y]}{\mathbf{E}_{t \sim p_1(t|\mathbf{x})}[t] - \mathbf{E}_{t \sim p_2(t|\mathbf{x})}[t]} = u(\mathbf{x}).$$

□

## E Proof of Theorem 2

We restate Theorem 2 below.

**Theorem 2.** Assume that  $n_1 = n_2$ ,  $\tilde{n}_1 = \tilde{n}_2$ ,  $p_1(\mathbf{x}) = p_2(\mathbf{x})$ ,  $W := \inf_{x \in \mathcal{X}} |\mu_w(\mathbf{x})| > 0$ ,  $M_Z := \sup_{z \in \mathcal{Z}} |z| < \infty$ ,  $M_F := \sup_{f \in F, x \in \mathcal{X}} |f(x)| < \infty$ , and  $M_G := \sup_{g \in G, x \in \mathcal{X}} |g(x)| < \infty$ . Then, the following holds with probability at least  $1 - \delta$  that for every  $f \in F$ ,

$$\mathbf{E}_{\mathbf{x} \sim p(\mathbf{x})}[(f(\mathbf{x}) - u(\mathbf{x}))^2] \leq \frac{1}{W^2} \left[ \sup_{g \in G} \widehat{J}(f, g) + \mathcal{R}_{F, G}^{n, \tilde{n}} + \left( \frac{M_z}{\sqrt{2n}} + \frac{M_w}{\sqrt{2\tilde{n}}} \right) \sqrt{\log \frac{2}{\delta}} + \varepsilon_G(f) \right],$$

where  $M_z := 4M_Y M_G + M_G^2/2$ ,  $M_w := 2M_F M_G + M_G^2/2$ ,  $\mathcal{R}_{F,G}^{n,\tilde{n}} := 2(M_F + 4M_Z)\mathfrak{R}_{p(\mathbf{x},z)}^n(G) + 2(2M_F + M_G)\mathfrak{R}_{p(\mathbf{x},w)}^{\tilde{n}}(F) + 2(M_F + M_G)\mathfrak{R}_{p(\mathbf{x},w)}^{\tilde{n}}(G)$ .

Define  $J(f, g)$  and  $\widehat{J}(f, g)$  as in Section 3.2 and denote

$$\varepsilon_G(f) := \sup_{g \in L^2(p)} J(f, g) - \sup_{g \in G} J(f, g).$$

**Definition 1** (Rademacher Complexity). *We define the Rademacher complexity of  $H$  over  $N$  random variables following probability distribution  $q$  by*

$$\mathfrak{R}_p^N(H) = \mathbf{E}_{V_1, \dots, V_N, \sigma_1, \dots, \sigma_N} \left[ \sup_{h \in H} \frac{1}{N} \sum_{i=1}^N \sigma_i h(V_i) \right],$$

where  $\sigma_1, \dots, \sigma_N$  are independent,  $\{-1, 1\}$ -valued uniform random variables.

**Lemma 3.** *Under the assumptions of Theorem 2, with probability at least  $1 - \delta$ , it holds that for every  $f \in F$ ,*

$$J(f, g) \leq \widehat{J}(f, g) + \mathfrak{R}_{F,G} + \left( \frac{M_z}{\sqrt{n}} + \frac{M_w}{\sqrt{\tilde{n}}} \right) \sqrt{\log \frac{2}{\delta}}.$$

To prove Lemma 3, we use the following lemma, which is a slightly modified version of Theorem 3.1 in Mohri et al. [22].

**Lemma 4.** *Let  $H$  be a set of real-valued functions on a measurable space  $\mathcal{D}$ . Assume that  $M := \sup_{h \in H, v \in \mathcal{D}} h(v) < \infty$ . Then, for any  $h \in H$  and any  $\mathcal{D}$ -valued i.i.d. random variables  $V, V_1, \dots, V_N$  following density  $q$ , we have*

$$\mathbf{E}[h(V)] \leq \frac{1}{N} \sum_{i=1}^N h(V_i) + 2\mathfrak{R}_q^N(H) + \sqrt{\frac{M^2}{N} \log \frac{1}{\delta}}. \quad (17)$$

*Proof of Lemma 4.* We follow the proof of Theorem 3.1 in Mohri et al. [22] except that we set the constant  $B_\phi$  in Eq. (28) to  $M/m$  when we apply McDiarmid's inequality (Section M).  $\square$

Now, we prove Lemma 3.

*Proof of Lemma 3.* For any  $f \in \mathcal{F}$ ,  $g \in \mathcal{G}$ ,  $\mathbf{x}', \tilde{\mathbf{x}}' \in \mathcal{X}$ ,  $z' \in \mathcal{Z} := \{y, -y \mid y \in \mathcal{Y}\}$ , and  $w' \in \{-1, 1\}$ , we define  $h_z$  and  $h_w$  as follows:

$$\begin{aligned} h_z(\mathbf{x}', z'; g) &:= -4z'g(\mathbf{x}') - \frac{1}{2}g(\mathbf{x}')^2, \\ h_w(\tilde{\mathbf{x}}', w'; f, g) &:= w'f(\tilde{\mathbf{x}}')g(\tilde{\mathbf{x}}') - \frac{1}{2}g(\tilde{\mathbf{x}}')^2. \end{aligned}$$

Denoting  $H_z := \{(\mathbf{x}', z') \mapsto h_z(\mathbf{x}', z'; g) \mid g \in G\}$ , we have

$$\sup_{h \in H_z, \mathbf{x}' \in \mathcal{X}, z' \in \mathcal{Z}} |h(\mathbf{x}', z')| \leq 4M_Z M_G + \frac{1}{2}M_G^2 =: M_z < \infty,$$

and thus, we can apply Lemma 4 to confirm that with probability at least  $1 - \delta/2$ ,

$$\mathbf{E}_{(\mathbf{x}, z) \sim p(\mathbf{x}, z)}[h_z(\mathbf{x}, z; g)] \leq \frac{1}{n} \sum_{(\mathbf{x}_i, z_i) \in S_z} h_z(\mathbf{x}_i, z_i; g) + 2\mathfrak{R}_p^n(H_z) + \sqrt{\frac{M_z^2}{n} \log \frac{2}{\delta}},$$

where  $\{(\mathbf{x}_i, z_i)\}_{i=1}^n =: S_z$  are the samples defined in Section 4.1. Similarly, it holds that with probability at least  $1 - \delta/2$ ,

$$\mathbf{E}_{(\tilde{\mathbf{x}}, w) \sim p(\tilde{\mathbf{x}}, w)}[h_w(\tilde{\mathbf{x}}, w; f, g)] \leq \frac{1}{\tilde{n}} \sum_{(\tilde{\mathbf{x}}_i, w_i) \in S_w} h_w(\tilde{\mathbf{x}}_i, w_i; f, g) + 2\mathfrak{R}_p^{\tilde{n}}(H_w) + \sqrt{\frac{M_w^2}{\tilde{n}} \log \frac{2}{\delta}},$$

where  $H_w := \{(\tilde{\mathbf{x}}', w') \mapsto h_w(\tilde{\mathbf{x}}', w'; f, g) \mid f \in F, g \in G\}$ ,  $M_w := M_F M_G + M_G^2/2$ , and  $\{(\tilde{\mathbf{x}}_i, w_i)\}_{i=1}^{\tilde{n}} =: S_w$  are the samples defined in Section 4.1. By the union bound, we have the following with probability at least  $1 - \delta$ :

$$\mathbf{E}_{(\mathbf{x}, z) \sim p(\mathbf{x}, z)}[h_z(\mathbf{x}, z; g)] + \mathbf{E}_{(\tilde{\mathbf{x}}, w) \sim p(\tilde{\mathbf{x}}, w)}[h_w(\tilde{\mathbf{x}}, w; f, g)] \quad (18)$$

$$\leq \frac{1}{n} \sum_{(\mathbf{x}_i, z_i) \in S_z} h_z(\mathbf{x}_i, z_i; g) + \frac{1}{\tilde{n}} \sum_{(\tilde{\mathbf{x}}_i, w_i) \in S_w} h_w(\tilde{\mathbf{x}}_i, w_i; f, g) \quad (19)$$

$$+ 2(\mathfrak{R}_p^n(H_z) + \mathfrak{R}_p^{\tilde{n}}(H_w)) + \left( \frac{M_z}{\sqrt{n}} + \frac{M_w}{\sqrt{\tilde{n}}} \right) \sqrt{\log \frac{2}{\delta}}, \quad (20)$$

Using some properties of the Rademacher complexity including Talagrand's lemma, we can show that

$$\mathfrak{R}_p^n(H_z) \leq (M_F + 4M_Z)\mathfrak{R}_p^n(G), \quad (21)$$

$$\mathfrak{R}_p^{\tilde{n}}(H_w) \leq (2M_F + M_G)\mathfrak{R}_p^{\tilde{n}}(F) + (M_F + M_G)\mathfrak{R}_p^{\tilde{n}}(G). \quad (22)$$

Clearly,

$$\begin{aligned} \hat{J}(f, g) &= \frac{1}{n} \sum_{(\mathbf{x}_i, z_i) \in S_z} h(\mathbf{x}_i, z_i; g) + \frac{1}{\tilde{n}} \sum_{(\tilde{\mathbf{x}}_i, w_i) \in S_w} h(\tilde{\mathbf{x}}_i, w_i; f, g), \\ J(f, g) &= \mathbf{E}_{(\mathbf{x}, z) \sim p(\mathbf{x}, z)}[h_z(\mathbf{x}, z; g)] + \mathbf{E}_{(\tilde{\mathbf{x}}, w) \sim p(\mathbf{x}, z)}[h_w(\tilde{\mathbf{x}}, w; f, g)]. \end{aligned}$$

From Eq. (20), Eq. (21), and Eq. (22), we obtain

$$J(f, g) \leq \hat{J}(f, g) + \mathfrak{R}_{F, G} + \left( \frac{M_z}{\sqrt{n}} + \frac{M_w}{\sqrt{\tilde{n}}} \right) \sqrt{\log \frac{2}{\delta}}, \quad (23)$$

where

$$\mathfrak{R}_{F, G} := 2(M_F + 4M_Z)\mathfrak{R}_p^n(G) + 2(2M_F + M_G)\mathfrak{R}_p^{\tilde{n}}(F) + 2(M_F + M_G)\mathfrak{R}_p^{\tilde{n}}(G).$$

□

Finally, we prove Theorem 2.

*Proof of Theorem 2.* From Lemma 3, with probability at least  $1 - \delta$ , it holds that for all  $f \in F$

$$\sup_{g \in G} J(f, g) \leq \sup_{g \in G} \hat{J}(f, g) + \mathfrak{R}_{F, G} + \left( \frac{M_z}{\sqrt{n}} + \frac{M_w}{\sqrt{\tilde{n}}} \right) \sqrt{\log \frac{2}{\delta}}. \quad (24)$$

Moreover, recalling  $W := \inf_{\mathbf{x} \in \mathcal{X}} |\mu_w(\mathbf{x})|$  and  $\sup_{g \in L^2(p)} J(f, g) = \mathbf{E}[(\mu_w(\mathbf{x})f(\mathbf{x}) - \mu_z(\mathbf{x}))^2]$ , we have

$$\mathbf{E}[(f(\mathbf{x}) - u(\mathbf{x}))^2] = \mathbf{E} \left[ \left( f(\mathbf{x}) - \frac{\mu_z(\mathbf{x})}{\mu_w(\mathbf{x})} \right)^2 \right] \quad (25)$$

$$\leq \frac{1}{W^2} \mathbf{E}[(\mu_w(\mathbf{x})f(\mathbf{x}) - \mu_z(\mathbf{x}))^2] \quad (26)$$

$$= \frac{1}{W^2} \left[ \varepsilon_G(f) + \sup_{g \in G} J(f, g) \right]. \quad (27)$$

Combining Eq. (24) and Eq. (27) yields the inequality of the theorem. □

## F Proof of Corollary 1

**Corollary 1.** Let  $F = \{x \mapsto \boldsymbol{\alpha}^\top \phi(\mathbf{x}) \mid \|\boldsymbol{\alpha}\|_2 \leq \Lambda_F\}$ ,  $G = \{x \mapsto \boldsymbol{\beta}^\top \psi(\mathbf{x}) \mid \|\boldsymbol{\beta}\|_2 \leq \Lambda_G\}$ , and assume that  $r_F := \sup_{\mathbf{x} \in \mathcal{X}} \|\phi(\mathbf{x})\|_2 < \infty$  and  $r_G := \sup_{\mathbf{x} \in \mathcal{X}} \|\psi(\mathbf{x})\|_2 < \infty$ , where  $\|\cdot\|_2$  is the  $L_2$ -norm. Under the assumptions of Theorem 2, it holds with probability at least  $1 - \delta$  that for every  $f \in F$ ,

$$\mathbf{E}_{\mathbf{x} \sim p(\mathbf{x})}[(f(\mathbf{x}) - u(\mathbf{x}))^2] \leq \frac{1}{W^2} \left[ \sup_{g \in G} \hat{J}(f, g) + \frac{C_z \sqrt{\log \frac{2}{\delta}} + D_z}{\sqrt{2n}} + \frac{C_w \sqrt{\log \frac{2}{\delta}} + D_w}{\sqrt{2\tilde{n}}} + \varepsilon_G(f) \right],$$

where  $C_z := r_G^2 \Lambda_G^2 + 4r_G \Lambda_G M_Y$ ,  $C_w := 2r_F^2 \Lambda_F^2 + 2r_F r_G \Lambda_F \Lambda_G + r_G^2 \Lambda_G^2$ ,  $D_z := r_G^2 \Lambda_G^2 / 2 + 4r_G \Lambda_G M_Y$ , and  $D_w := r_G^2 \Lambda_G^2 / 2 + 4r_F r_G \Lambda_F \Lambda_G$ .

*Proof.* Under the assumptions, it is known that the Rademacher complexity of the linear-in-parameter model  $F$  can be upper bounded as follows [22]:

$$\mathfrak{R}_p^N(F) \leq \frac{r_F \Lambda_F}{\sqrt{N}}.$$

We can bound  $\mathfrak{R}_p^N(G)$  similarly. Applying these bounds to Theorem 2, we obtain the statement of Corollary 1. □

## G Proof of Theorem 3

We prove the following, formal version of Theorem 3.

**Theorem 3.** *Under the assumptions of Corollary 1, it holds with probability at least  $1 - \delta$  that  $\mathbf{E}[(\hat{f}(\mathbf{x}) - u(\mathbf{x}))^2] \leq (4e_{n,\delta} + 2\varepsilon_G^F + \varepsilon_F)/W^2$ , where  $\varepsilon_G^F := \sup_{f \in F} \varepsilon_G(f)$ , and  $\varepsilon_F := \inf_{f \in F} J(f)$ ,  $\hat{f} \in F$  is any approximate solution to  $\inf_{f \in F} \sup_{g \in G} \hat{J}(f, g)$  satisfying  $\sup_{g \in G} \hat{J}(\hat{f}, g) \leq \inf_{f \in F} \sup_{g \in G} \hat{J}(f, g) + e_{n,\delta}$ , and*

$$e_{n,\delta} := \frac{C_z \sqrt{\log \frac{2}{\delta}} + D_z}{\sqrt{2n}} + \frac{C_w \sqrt{\log \frac{2}{\delta}} + D_w}{\sqrt{2\tilde{n}}}.$$

*Proof.* Let  $J(f) := \sup_{g \in L^2} J(f, g) = \mathbf{E}[(\mu_w(\mathbf{x})f(\mathbf{x}) - \mu_z(\mathbf{x}))^2]$ ,  $J_G(f) := \sup_{g \in G} J(f, g)$ ,  $\hat{J}_G(f) := \sup_{g \in G} \hat{J}(f, g)$ . Let  $\tilde{f} \in F$  be any approximate solution to  $\inf_{f \in F} J(f)$  satisfying  $J(\tilde{f}) \leq \varepsilon_F + e_{n,\delta}$ .

As a special case of Eq. 24, we can prove that with probability at least  $1 - \delta$ , it holds for every  $f \in F$  that  $J_G(f) \leq \hat{J}_G(f) + e_{n,\delta}$ . From Corollary 1, it holds that with probability at least  $1 - \delta$ ,

$$\begin{aligned} J(\hat{f}) &\leq [J(\hat{f}) - J_G(\hat{f})] + [J_G(\hat{f}) - \hat{J}_G(\hat{f})] + [\hat{J}_G(\hat{f}) - \hat{J}_G(\tilde{f})] \\ &\quad + [\hat{J}_G(\tilde{f}) - J_G(\tilde{f})] + [J_G(\tilde{f}) - J(\tilde{f})] + J(\tilde{f}) \\ &\leq \varepsilon_G^F + e_{n,\delta} + e_{n,\delta} \\ &\quad + e_{n,\delta} + \varepsilon_G^F + [\varepsilon_F + e_{n,\delta}] \\ &\leq 4e_{n,\delta} + 2\varepsilon_G^F + \varepsilon_F. \end{aligned}$$

Since  $\mathbf{E}[(\hat{f}(\mathbf{x}) - u(\mathbf{x}))^2] \leq \frac{1}{W^2} J(\hat{f})$ , we obtain the bound in Theorem 3.  $\square$

## H Binary Outcomes

When outcomes  $y$  take on binary values, e.g., success or failure, without loss of generality, we can assume that  $y \in \{-1, 1\}$ . Then, by the definition of the individual uplift,  $u(\mathbf{x}) \in [-2, 2]$  for any  $\mathbf{x} \in \mathbb{R}^d$ . In order to incorporate this fact, we may add the following range constraints on  $f$ :  $-2 \leq f(\mathbf{x}) \leq 2$  for every  $\mathbf{x} \in \{\mathbf{x}_i\}_{i=1}^n \cup \{\tilde{\mathbf{x}}_i\}_{i=1}^{\tilde{n}}$ .

## I Cases Where $p_1(\mathbf{x}) \neq p_2(\mathbf{x})$ or $(n_1, \tilde{n}_1) \neq (n_1, \tilde{n}_1)$

So far, we have assumed that  $p_1(\mathbf{x}) = p_2(\mathbf{x})$ ,  $m_1 = m_2$ , and  $n_1 = n_2$ . The proposed method can be adapted to the more general case where these assumptions may not hold.

Let  $r_k(\mathbf{x}) = \frac{n}{2n_k} \cdot \frac{p(\mathbf{x})}{p_k(\mathbf{x})}$  and  $\tilde{r}_k(\mathbf{x}) = \frac{\tilde{n}}{2\tilde{n}_k} \cdot \frac{p(\mathbf{x})}{p_k(\mathbf{x})}$ ,  $k = 1, 2$ , for every  $\mathbf{x}$  with  $p_k(\mathbf{x}) > 0$ . Let  $k_i := 1$  if the sample  $\mathbf{x}_i$  originally comes from  $p_1(\mathbf{x})$ , and  $k_i := 2$  if it comes from  $p_2(\mathbf{x})$ . Similarly, define  $\tilde{k}_i \in \{1, 2\}$  according to whether  $\tilde{\mathbf{x}}_i$  comes from  $p_1(\mathbf{x})$  or  $p_2(\mathbf{x})$ . Then, unbiased estimators of the three terms in the proposed objective Eq. (10) are given as the following weighted sample averages using  $r_k$  and  $\tilde{r}_k$ :

$$\begin{aligned} \mathbf{E}_{\mathbf{x} \sim p(\mathbf{x})}[wf(\mathbf{x})g(\mathbf{x})] &\approx \frac{1}{\tilde{n}} \sum_{i=1}^{\tilde{n}} [w_i f(\tilde{\mathbf{x}}_i) g(\tilde{\mathbf{x}}_i) \tilde{r}_{\tilde{k}_i}(\tilde{\mathbf{x}}_i)], \\ \mathbf{E}_{\mathbf{x} \sim p(\mathbf{x})}[zg(\mathbf{x})] &\approx \frac{1}{n} \sum_{i=1}^n [z_i g(\mathbf{x}_i) r_{k_i}(\mathbf{x}_i)] \\ \mathbf{E}_{\mathbf{x} \sim p(\mathbf{x})}[g(\mathbf{x})^2] &\approx \frac{1}{2n} \sum_{i=1}^n [g(\mathbf{x}_i)^2 r_{k_i}(\mathbf{x}_i)] + \frac{1}{2\tilde{n}} \sum_{i=1}^{\tilde{n}} [g(\tilde{\mathbf{x}}_i)^2 \tilde{r}_{\tilde{k}_i}(\tilde{\mathbf{x}}_i)]. \end{aligned}$$

The density ratios  $p_k(\mathbf{x})/p(\mathbf{x})$  can be accurately estimated using i.i.d. samples from  $p_k(\mathbf{x})$  and  $p(\mathbf{x})$  [21, 23, 35, 38].

## J Unbiasedness of the Weighted Sample Average

Below, we show that the weighted sample averages are unbiased estimates. We only prove for  $\mathbf{E}[wf(\mathbf{x})g(\mathbf{x})]$  since the other cases can be proven similarly. The expectation of the weighted sample average transforms as

follows:

$$\begin{aligned}
& \frac{1}{\tilde{n}} \sum_{i=1}^{\tilde{n}} \mathbf{E}_{\tilde{\mathbf{x}}_i^{(k)} \sim p_k(\mathbf{x}), t_i^{(k)} \sim p_k(t|\mathbf{x})} \left[ w_i f(\tilde{\mathbf{x}}_i) g(\tilde{\mathbf{x}}_i) \tilde{r}_{\tilde{k}_i}(\tilde{\mathbf{x}}_i) \right] \\
&= \frac{1}{\tilde{n}} \sum_{k=1,2} \sum_{i=1}^{\tilde{n}_k} \mathbf{E}_{\mathbf{x} \sim p_k(\mathbf{x}), t \sim p_k(t|\mathbf{x})} \left[ (-1)^{k-1} t f(\mathbf{x}) g(\mathbf{x}) \frac{\tilde{n}}{2\tilde{n}_k} \cdot \frac{p(\mathbf{x})}{p_k(\mathbf{x})} \right] \\
&= \frac{1}{2} \sum_{k=1,2} \mathbf{E}_{\mathbf{x} \sim p(\mathbf{x}), t \sim p_k(t|\mathbf{x})} \left[ (-1)^{k-1} t f(\mathbf{x}) g(\mathbf{x}) \right] \\
&= \iint (-1)^{k-1} t \sum_{k=1,2} \frac{1}{2} p_k(t|\mathbf{x}) f(\mathbf{x}) g(\mathbf{x}) p(\mathbf{x}) dt d\mathbf{x} \\
&= \iint w p(w|\mathbf{x}) f(\mathbf{x}) g(\mathbf{x}) p(\mathbf{x}) dt d\mathbf{x} \\
&= \mathbf{E}_{\mathbf{x} \sim p(\mathbf{x}), w \sim p(w|\mathbf{x})} [w f(\mathbf{x}) g(\mathbf{x})].
\end{aligned}$$

## K Gaussian Basis Functions Used in Experiments

The  $l$ -th element of  $\phi(\mathbf{x}) = (\phi_1(\mathbf{x}), \dots, \phi_{b_f}(\mathbf{x}))^\top$  is defined by

$$\phi_l(\mathbf{x}) := \exp \left( -\frac{\|\mathbf{x} - \mathbf{x}^{(l)}\|^2}{\sigma^2} \right),$$

where  $\mathbf{x}^{(l)}$ ,  $l = 1, \dots, b_f$ , are randomly chosen training data points. We used  $b_f = 100$  and  $\sigma = 25$  for all experiments.  $\psi$  is defined similarly.

## L Justification of the Sub-Sampling Procedure

Suppose that we want a sample subset  $S_k$  following the treatment policy  $p_k(t|\mathbf{x})$ . For each sample  $(\mathbf{x}_i, t_i, y_i) \sim p(\mathbf{x}, t, y)$  in the original dataset, we randomly add it into  $S_k$  with probability proportional to  $p_k(t_i|\mathbf{x}_i)/p(t_i|\mathbf{x}_i)$ . Then,

$$\begin{aligned}
p(\mathbf{x}_i, t_i, y_i | (\mathbf{x}_i, t_i, y_i) \in S_k) &= \frac{p((\mathbf{x}_i, t_i, y_i) \in S_k | \mathbf{x}_i, t_i, y_i) p(\mathbf{x}_i, t_i, y_i)}{\int \sum_{y_i, t_i} p((\mathbf{x}_i, t_i, y_i) \in S_k | \mathbf{x}_i, t_i, y_i) p(\mathbf{x}_i, t_i, y_i) d\mathbf{x}_i} \\
&= \frac{p_k(t_i|\mathbf{x}_i) p(y_i|\mathbf{x}_i, t_i) p(\mathbf{x}_i)}{\int \sum_{y_i, t_i} p_k(t_i|\mathbf{x}_i) p(y_i|\mathbf{x}_i, t_i) p(\mathbf{x}_i) d\mathbf{x}_i} \\
&= p_k(t_i|\mathbf{x}_i) p(y_i|\mathbf{x}_i, t_i) p(\mathbf{x}_i).
\end{aligned}$$

This means that the subsamples  $S_k$  preserve the original  $p(y|\mathbf{x}, t)$  and  $p(\mathbf{x})$  but follow the desired treatment policy  $p_k(t|\mathbf{x})$ .

## M McDiarmid's Inequality

Although McDiarmid's inequality is a well known theorem, we present the statement to make the paper self-contained.

**Theorem 4** (McDiarmid's inequality). *Let  $\varphi : \mathcal{D}^N \rightarrow \mathbb{R}$  be a measurable function. Assume that there exists a real number  $B_\varphi > 0$  such that*

$$|\varphi(v_1, \dots, v_N) - \varphi(v'_1, \dots, v'_N)| \leq B_\varphi, \quad (28)$$

*for any  $v_i, \dots, v_N, v'_1, \dots, v'_N \in \mathcal{D}$  where  $v_i = v'_i$  for all but one  $i \in \{1, \dots, N\}$ . Then, for any  $\mathcal{D}$ -valued independent random variables  $V_1, \dots, V_N$  and any  $\delta > 0$  the following holds with probability at least  $1 - \delta$ :*

$$\varphi(V_1, \dots, V_N) \leq \mathbf{E}[\varphi(V_1, \dots, V_N)] + \sqrt{\frac{B_\varphi^2 N}{2} \log \frac{1}{\delta}}.$$
